# Supplementary figures and images for: Multiple roles for Sox2 in the developing and adult mouse trachea
Source: Oxford University Press journal article supplement (doi:10.1242/dev.034629), 2009-04-30

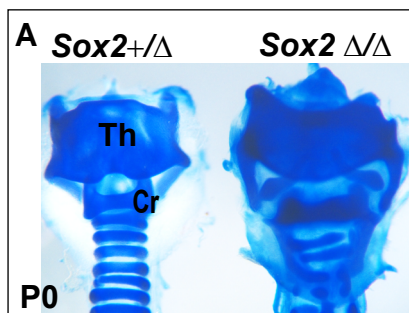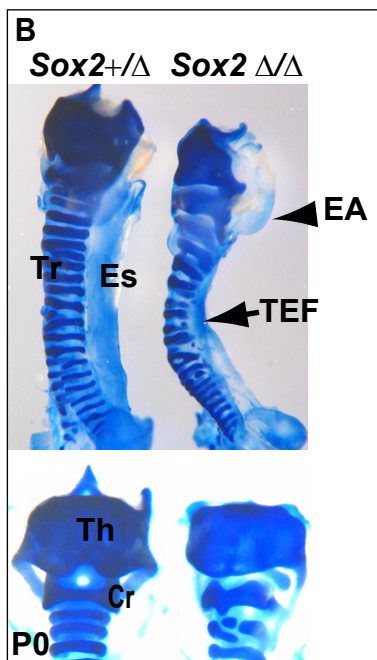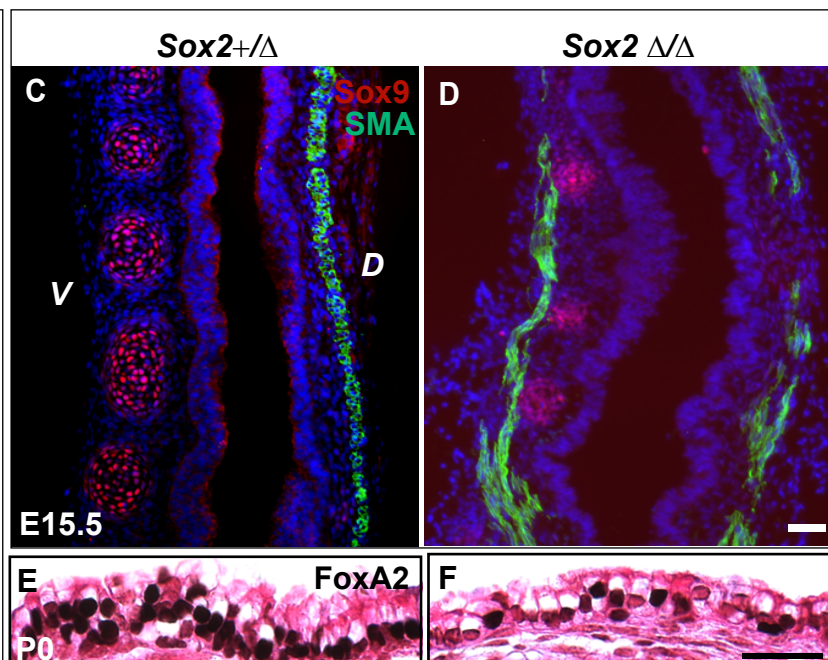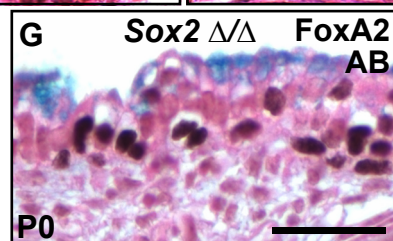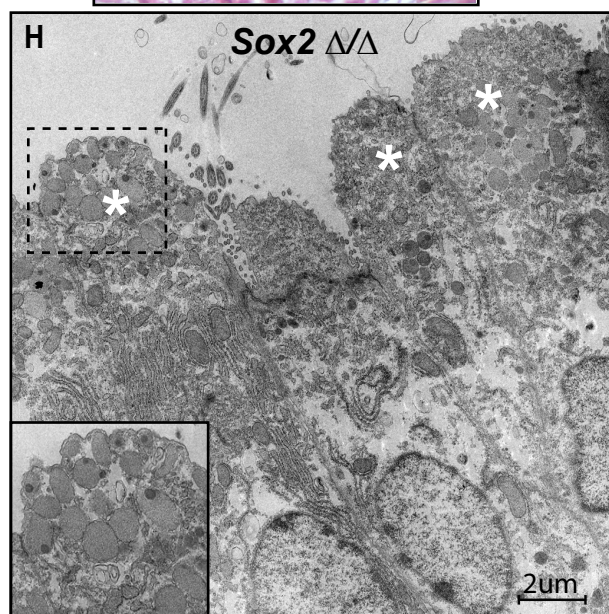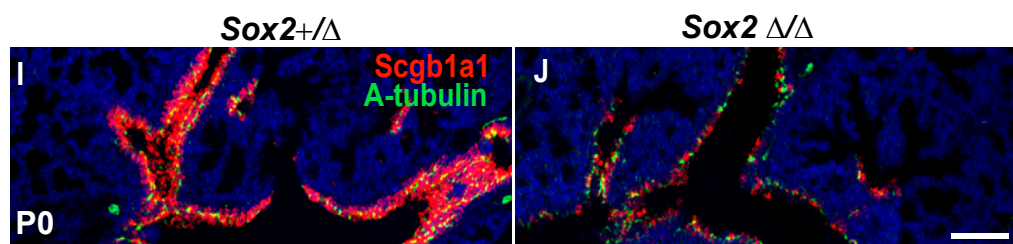

Supplement: dev034629-sup-034629-figs2.pdf [file dev034629-sup-034629-figs2.pdf]

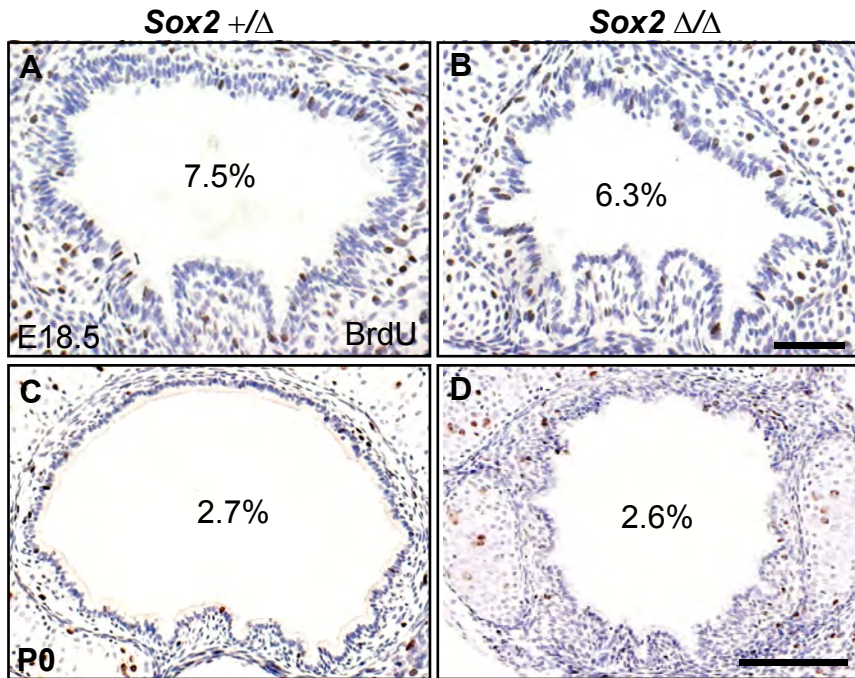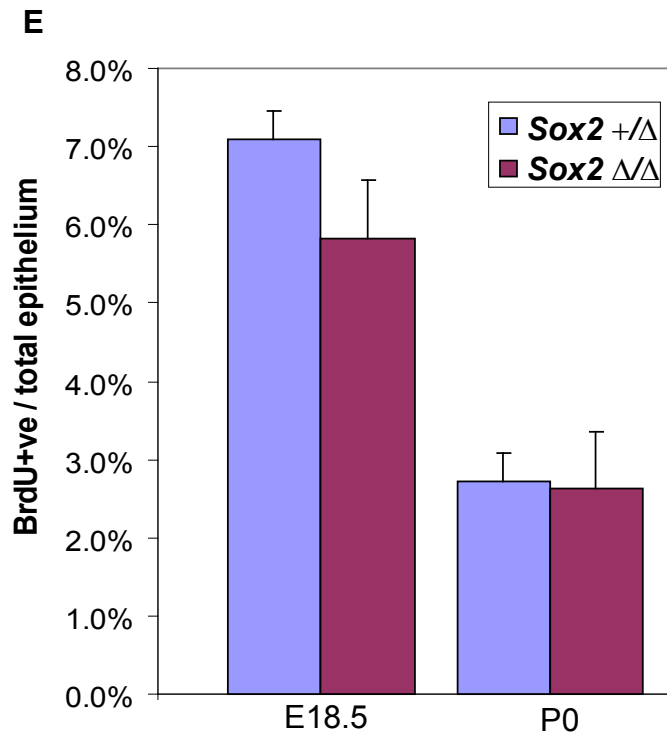

Supplement: dev034629-sup-034629-figs3.pdf [file dev034629-sup-034629-figs3.pdf]

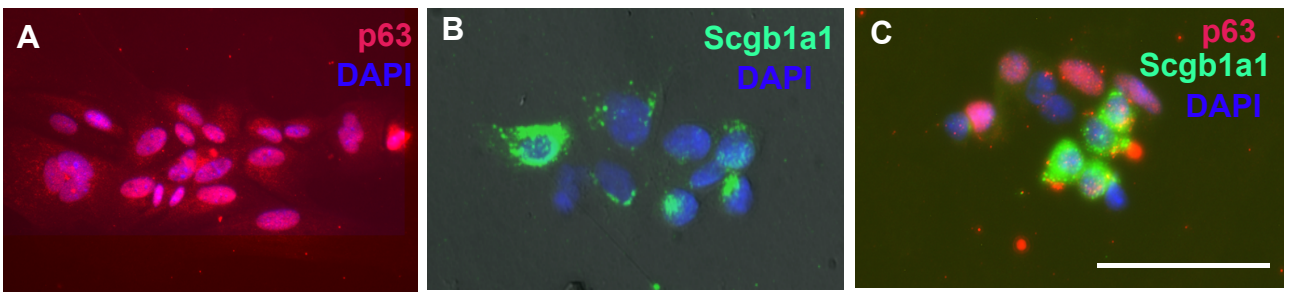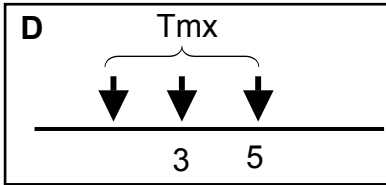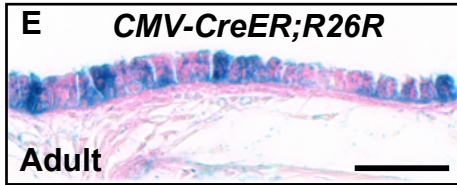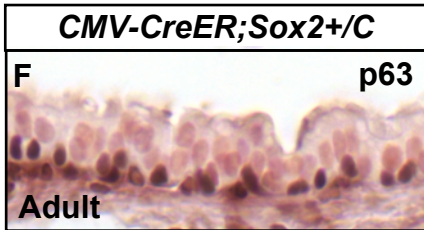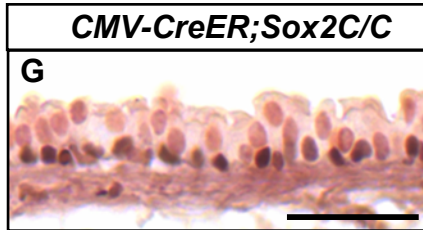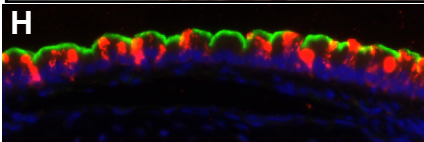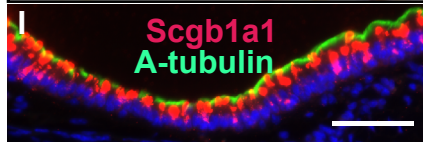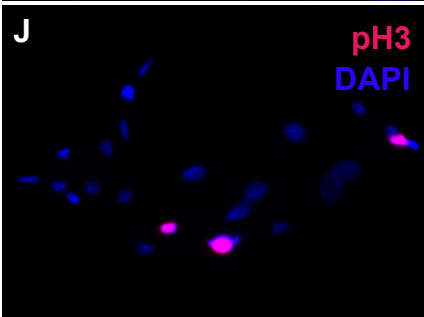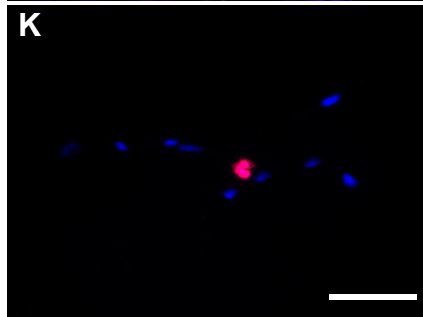

*CMV-CreER;Sox2+/COND*

*CMV-CreER;Sox2COND/COND*

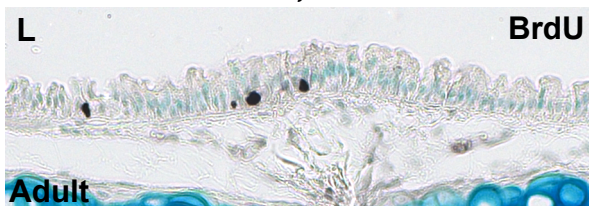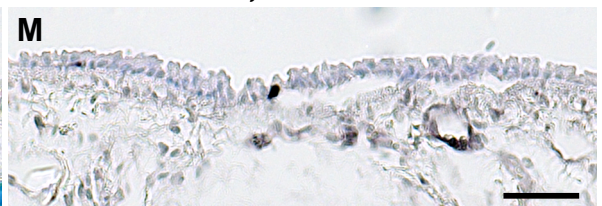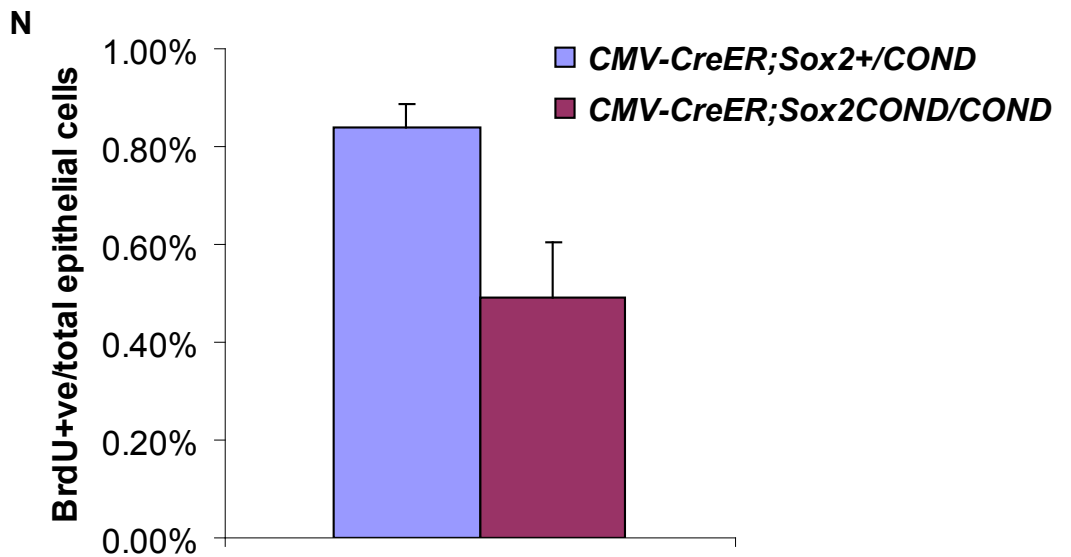

Supplement: dev034629-sup-034629-figs4.pdf [file dev034629-sup-034629-figs4.pdf]
